# Supplementary material
Source: Springer Nature journal article supplement (https://www.springermedizin.de/resource/supplementary/12874_2010_639_MOESM1_ESM.pdf/9432296)
Supplement: MOESM1 [file 9432296]

## Online mode

Mailed personal invitation letter with:

- \* login details
- \* option to request paper copy

As above

## Sequential mixed mode

Mailed personal invitation letter with:

- \* login details
- \* option to request paper copy

Mailed personal invitation letter with:

- \* paper copy & reply paid envelope
- \* option to complete online

## Simultaneous mixed mode

Mailed personal invitation letter with:

- \* paper copy & reply paid envelope
- \* option to complete online

Mailed personal invitation letter with:

- \* login details
- \* option to request paper copy
